# There's So Much More to PSYCHIATRIC SERVICES Than Meets the Page!

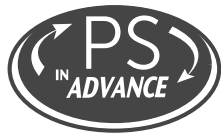

## Psychiatric Services in Advance

Latest research reports!

### SHAPE Intervention Helps Young Adults Lose Weight, Get Fit

Young adults with serious mental illness who participated in the 12-month SHAPE life-style intervention achieved significant weight loss and reduced their cardiovascular risk.

### Using the DSM-5's CFI to Build Culturally Sensitive Services

The Cultural Formulation Interview (CFI) in DSM-5 is a set of questions designed to help clinicians understand a person's treatment expectations within his or her cultural context. This Best Practices column describes how routine use of the CFI can identify a patient's unique needs and point to individualized treatment goals.

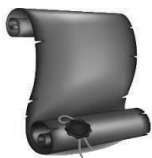

## Revisit the field's rich history!

### 50 Years Ago in *Psychiatric Services*

- Six-Session Outpatient Therapy
- Hospital Duck Population Explodes
- Developments in British Psychiatric Services

AMERICAN  
PSYCHIATRIC  
ASSOCIATION  
PUBLISHING

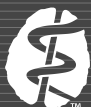

[ps.psychiatryonline.org](http://ps.psychiatryonline.org)

[www.appi.org](http://www.appi.org) • 1-800-368-5777 • Fax: 703-907-1091 • Email: [appi@psych.org](mailto:appi@psych.org)

Priority Code AH1520

## FREE Online Subscription to *Psychiatric Services* for APA Resident-Fellow Members (RFMs)!

American Psychiatric Association Resident-Fellow Members (RFMs) can receive a free online subscription to *Psychiatric Services*.

Simply visit [ps.psychiatryonline.org](http://ps.psychiatryonline.org) for full-text access to all of the content of APA's highly ranked, peer-reviewed monthly journal.

*Psychiatric Services* focuses on service delivery in organized systems of care, evolving best practices, and federal and state policies that affect the care of people with mental illnesses.

Please visit [ps.psychiatryonline.org](http://ps.psychiatryonline.org) and log in with your American Psychiatric Association username and password.

Psychiatry residents who are not currently APA Resident-Fellow Members should consider membership in the American Psychiatric Association. The benefits provided to residents are an example of how the APA serves the needs of its members throughout their careers. The low introductory dues APA extends to RFMs are even waived for the first year. Please visit [www.psychiatry.org/joinapa](http://www.psychiatry.org/joinapa) for more information.

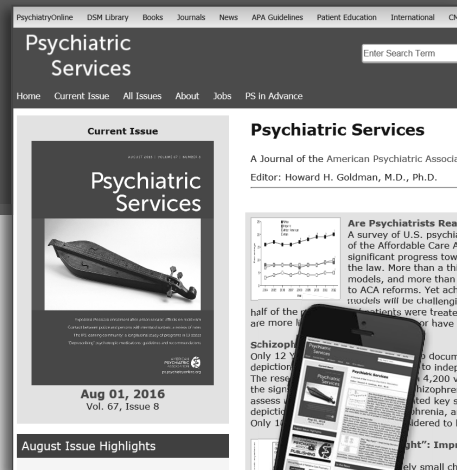

[ps.psychiatryonline.org](http://ps.psychiatryonline.org)

AMERICAN  
PSYCHIATRIC  
ASSOCIATION  
PUBLISHING

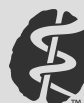

[www.appi.org](http://www.appi.org)  
Email: [appi@psych.org](mailto:appi@psych.org)  
Toll-Free: 1-800-368-5777

AH1643A

## Pocket Guide to Addiction Assessment and Treatment

Edited by Petros Levounis, M.D., M.A.,  
Erin Zerbo, M.D., and Rashi Aggarwal, M.D.

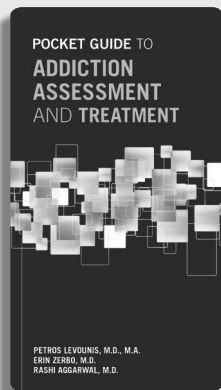

*The Pocket Guide to Addiction Assessment and Treatment* is designed specifically to aid a wide range of clinicians, regardless of their training in addiction, to more confidently assess and treat this patient population. With an accessible, easily referenced format, this book serves as a go-to resource for general psychiatrists other practitioners involved in the addiction treatment field. And because all of the diagnostic discussions are DSM-5<sup>®</sup>-based, readers can be confident that they're getting the most relevant and up-to-date guidance on the topic.

2016 • 379 pages • ISBN 978-1-58562-512-3 • Paperback  
\$65.00 • Item #62512

2016 • 379 pages • ISBN 978-1-58562-512-3 • eBook  
\$52.00 • Item #37072

AMERICAN  
PSYCHIATRIC  
ASSOCIATION  
PUBLISHING

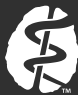

www.appi.org  
Email: appi@psych.org  
Phone: 1-800-368-5777

AH1639A

## UNMATCHED GROWTH OPPORTUNITIES

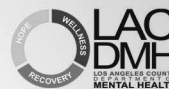

"Working at DMH provides security, stability, great benefits, and flexibility. They also offer a generous salary and opportunity for career advancement at every level. It's a challenging environment, but there's so much support that has really helped with my professional growth."

Anna Xiao, MD  
Psychiatrist

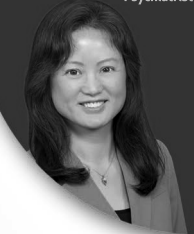

"DMH offers a very good work-life balance, and I'm able to grow professionally without sacrificing my personal life. Another advantage is not being buried in endless paperwork, I'm free to provide the services I think are necessary to my clients."

V. Dorina Trufasu, MD  
Psychiatrist & Internal Medicine

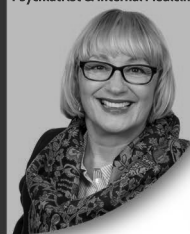

The Los Angeles County Department of Mental Health has immediate openings with Jail Mental Health Services, Juvenile Justice Correctional Facilities, Antelope Valley, and directly operated programs. This is your chance to join the leading mental health agency in the nation and work in a safe, diverse, and challenging environment. Our entire department is filled with opportunities for professional development and growth, and is expanding exponentially with 27 new full-time psychiatrist positions. We offer competitive salaries with potential bonuses up to \$30,000\* a year, depending on qualifications and placement, plus up to 24 hours a week is allowed for outside employment.

\*Based on CEO approval at step 15 of the mental health psychiatrist salary schedule.

[www.psychiatristjobs.la](http://www.psychiatristjobs.la)

**Psychiatric Services** (ISSN |1075-2730; online version, 1557-9700) is published monthly by the American Psychiatric Association, editorial and executive office, 1000 Wilson Blvd., Suite 1825, Arlington, VA 22209-3901. Copyright © 2016 by the American Psychiatric Association. Printed in U.S.A. Periodicals postage paid at Arlington, VA, and at additional mailing offices. POSTMASTER: Send address changes to **Psychiatric Services, 1000 Wilson Blvd., Suite 1825, Arlington, VA 22209-3901.**

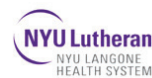

NYU Lutheran Family Health Center (NYU-LFHC), the FQHC outpatient component of the NYU Lutheran Psychiatry Service, is actively recruiting for multiple openings within our Behavioral Health Service Line. NYU-LFHC offers evidence based individualized treatment services for individuals managing mental health disorders, struggling with chemical dependency problems and/or coping with health issues associated with HIV/AIDS. Services are provided by multidisciplinary, multilingual, culturally competent treatment teams composed of physicians, nurses, psychologists, social workers and addiction counselors.

### Recruitment is ongoing for the following openings:

1. Network Behavioral Health Medical Director. Strong background/interest in community mental health, provides overall psychiatric leadership for all ambulatory behavioral health services. Including supervision and direction of the delivery of clinical services by all licensed and credentialed behavioral health providers, any health professions students and trainees assigned.
2. Child and Adolescent Psychiatrist: Will serve as Associate Medical Director and be responsible for evaluation of patients, diagnosis of illness, overall treatment planning, implementation and follow-up of treatment, and disposition of psychiatric patients. Participates in development of clinical programs and supervision of clinical staff participating in such programs.
3. Adult Psychiatrists (3 positions): Responsible for evaluation of patients, diagnosis of illness, overall treatment planning, implementation and follow-up of treatment, and disposition of psychiatric patients, in the outpatient setting. Specialization in addiction treatment is preferred for one of the open positions.

Learn more about our program and apply for a position by sending your CV to: **W. Gordon Frankle, MD, MBA, Chief, NYU Lutheran Psychiatry Service, and Sean Pavlow, Administrative Director, NYU Lutheran Psychiatry Service at [Sean.Pavlow@nyumc.org](mailto:Sean.Pavlow@nyumc.org)**

# New Psychotherapy Resources

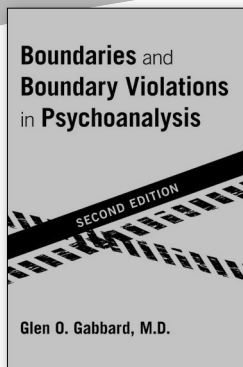

## Boundaries and Boundary Violations in Psychoanalysis, Second Edition

Glen O. Gabbard, M.D.

This new, thoroughly revised edition contains a wealth of new material, reflecting the current knowledge and evolving attitudes about boundary violations. The volume, which is based on the author's 30 years of experience evaluating, treating, and consulting on more than 300 cases of professional boundary violations, is essential reading for psychoanalysts, residents, training directors, therapists, and other mental health professionals.

2016 • 195 pages • ISBN 978-1-61537-017-7 • Paperback • \$69.00 • Item #37017  
2016 • 195 pages • ISBN 978-1-61537-071-9 • eBook • \$55.00 • Item #37071

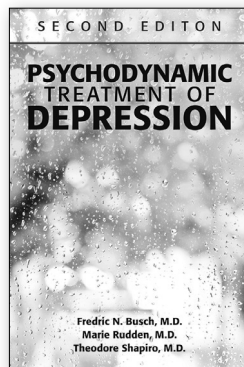

## Psychodynamic Treatment of Depression, Second Edition

Fredric N. Busch, M.D., Marie Rudden, M.D., and Theodore Shapiro, M.D.

The book's clear presentation of psychodynamic theories and their clinical applications promotes understanding for mental health professionals in diverse roles and practice settings. *Psychodynamic Treatment of Depression* offers current, concise, and comprehensive counsel for clinicians and trainees who seek to understand psychotherapeutic dynamics and hone their treatment skills.

2016 • 256 pages • ISBN 978-1-61537-035-1 • Paperback • \$65.00 • Item #37035  
2016 • 256 pages • ISBN 978-1-61537-069-6 • eBook • \$52.00 • Item #37069

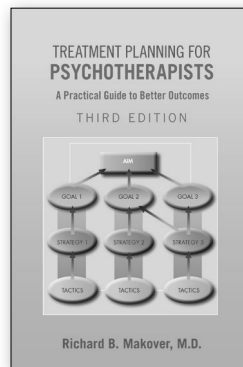

## Treatment Planning for Psychotherapists

*A Practical Guide to Better Outcomes, Third Edition*

Richard B. Makover, M.D.

This popular book offers a straightforward, practical method of organizing a treatment plan. It emphasizes a top-down, results-oriented approach that begins with the proposed outcome and then selects the objectives and methods to reach it. In this revised edition, Dr. Makover describes a new, simplified system that uses the initial assessment to formulate a case. The formulation then becomes the foundation of treatment decisions. Clinical cases offer clear examples of the planning process.

2016 • 268 pages • ISBN 978-1-61537-029-0 • Paperback • \$59.00 • Item #37029  
2016 • 268 pages • ISBN 978-1-61537-062-7 • eBook • \$47.00 • Item #37062

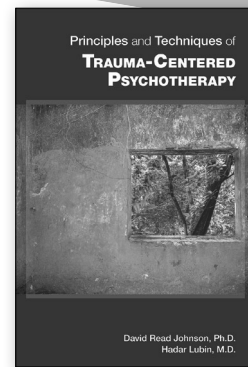

## Principles and Techniques of Trauma-Centered Psychotherapy

David Read Johnson, Ph.D., and Hadar Lubin, M.D.

From establishing the trauma treatment framework to navigating the inevitable disruptions to dealing with the negative effects on the therapist of hearing detailed accounts of traumatic events, *Principles and Techniques of Trauma-Centered Psychotherapy* is both pragmatic and empathic, providing effective strategies in the context of true life treatment.

2016 • 357 pages • ISBN 978-1-58562-514-7 • Paperback • \$62.00 • Item #62514  
2016 • 357 pages • ISBN 978-1-61537-021-4 • eBook • \$49.95 • Item #37021

AMERICAN  
PSYCHIATRIC  
ASSOCIATION  
PUBLISHING

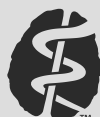

[www.appi.org](http://www.appi.org)

Email: [appi@psych.org](mailto:appi@psych.org)

Toll Free: 1-800-368-5777

**20% Discount** for American Psychiatric Association Members

**25% Discount** for APA Resident-Fellow Members

Please use Priority Code AH1603 when ordering.
