# Psychiatric Services

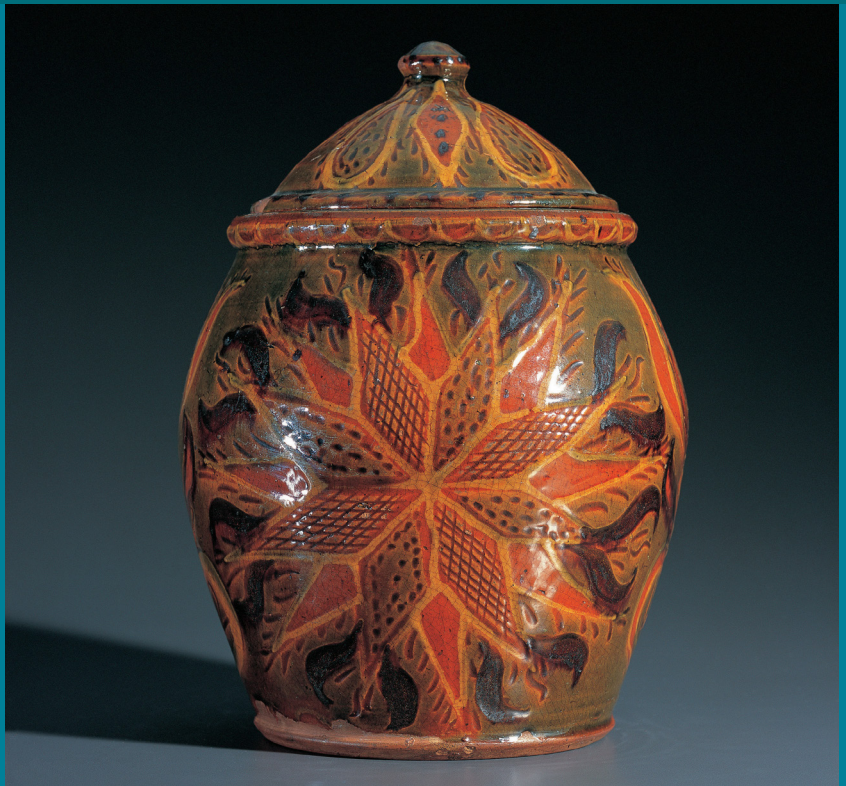

Emergency department boarding of psychiatric patients: prevalence and correlates

Preventing hospital readmissions among psychiatric patients: two studies

Clozapine use in the Veterans Health Administration: making the business case

CMHCs and integrated care: evaluating SAMHSA's PBHCI grant program
